# Supplementary material for: Development and Validation of the Policies, Opportunities, Initiatives and Notable Topics (POINTS) Audit for Campuses and Worksites
Source: MDPI journal article supplement (doi:10.3390/ijerph16050778), 2019-03-04
Supplement: s1 [file s1]

## S1: POINTS Audit Questions

The Healthy Environment POINTS Audit evaluates the extensiveness and quality of health promotion and obesity prevention policies and interventions/pledges/initiatives for a campus environment. To successfully complete this audit you need to critically think about the difference between a written policy and an intervention/pledge/initiative.

**Policy:** a written and published document outlining a definite course or method of action to determine and guide present and future decisions. Policies may have defined goals and procedures for implementation, including a charged department or individual responsible for their implementation.

**Initiative:** a series of projects or programs intended to encourage healthy behaviors and values. Initiatives may or may not contain any defined goals, procedures, or plans for implementing initiatives.

**Pledge/commitment:** a written and published agreement that is NOT specifically designated as being a policy. Pledges/commitments may or may not have defined goals or procedures for implementation.

Each of the policy topics follows. When you identify a policy for a specific audit topic, you must also indicate if the policy contains any of the following information:

### a. Regarding this policy/pledge (Select all that apply)

- It defines a mission or vision.
- It defines specific goals or aims.
- It defines specific outcomes.
- It outlines a plan for implementation.
- It charges a department or individual to implement it.
- It defines sanctions and fines.
- It defines a plan for monitoring and evaluating.
- It defines a plan for reassessing or reviewing it.

### b. Policy Evidence

Please provide all supporting evidence for a program or policy in the form of URL links to webpages. If you indicated that this topic was a policy, you MUST provide a web link to the policy page.

### **1. Smoking**

- 0: Smoking is permitted anywhere on campus, no smoking cessation programs or initiatives.
- 1: Encouraged smoking cessation. Smoking permitted in specific areas (i.e. away from buildings), smoking cessation pledge and programs.
- 2: A smoking policy can be located online. (NA)
- NA This topic does not apply to this campus or this campus population.

### **2. Alcohol**

- 0: There are no safe drinking initiatives or resources online.
- 1: Campus follows federal drinking laws; Safe, legal and moderate drinking is encouraged on campus webpages.
- 2: Campus has an alcohol policy; a safe alcohol education program might be mentioned in the body of the policy. NA

### **3. Health Education NOT for Credit**

- 0: No health education resources/programs online.
- 1: Health education resources available online; Might be campus specific; health pledge (i.e. American Heart Association's "My heart. My life.")
- 2: A health education policy is online that requires non-mandatory health education programs to implemented online/on-campus. NA

### **4. Nutrition Education NOT for Credit**

- 0: No nutrition education resources/programs online.
- 1: Nutrition education resources available online; Might be campus specific (i.e. healthy snack ideas on campus); might be general (i.e. MyPlate information)
- 2: A nutrition education policy is online that requires non-mandatory nutrition education programs to implemented online/on-campus. NA

### **5. Physical Education NOT for Credit**

- 0: No physical education resources/programs online.
- 1: Physical education resources available online; Might be campus specific (i.e. walking routes on campus); might be general (i.e. American Heart Association Physical activity recommendations)
- 2: A physical education policy is online that requires non-mandatory physical education programs to implemented online/on-campus. NA

### **6. Health Promotion (forms of media such as magazines, social media accounts, etc.)**

- 0: There are no forms of health promotion online.
- 1: Campus health blogs; mention of campus health magazine or digital download available.
- 2: A health promotion policy is online. Required health promotion by a department on-campus/online (i.e. weekly health newsletter blasts for all employees or students) NA

## **7. Campus Health Fair**

- 0: No evidence of a campus health fair or promotion of a community health fair.
- 1: Campus advertises a local health fair; Campus has its own health fair.
- 2: A health fair policy is online that requires a health fair on campus or promotion of community health fair for campus members to attend. NA

## **8. Campus Health Screenings**

- 0: No evidence of a campus health screening or promotion of one in the local community.
- 1: Campus advertises a local health screening; Campus has its own health screening; Campus encourages for members to seek health screenings on their own (i.e. blood pressure machine at health/grocery stores)
- 2: A health screening policy is online that requires a health screening on campus or promotion of community health screening for campus members to attend. NA

## **9. Chronic Disease Education**

- 0: No evidence of chronic disease education online.
- 1: Campus chronic disease programs; off-campus chronic disease education program info; online chronic disease management education/materials.
- 2: Chronic disease policy that requires chronic disease promotion on campus; individuals with a specified chronic disease to seek education; etc. NA

## **10. Healthy Habit Challenges**

- 0: No evidence of healthy challenges or rewards or incentives for healthy behaviors.
- 1: Campus encourages members to take a national health challenges. (i.e. AHA walking challenge); department healthy challenge programs; or campus wide healthy habit challenge program (i.e. Join campus in walking 10,000 steps/day)
- 2: Health habit challenge policy that requires campus (i.e. rec services department) to promote or implement healthy behavior challenges. Might specific if incentives need to be included. NA

### **11. Health Education Course Credit Requirement**

0: There is no health education credit requirement or health education courses for credit offered on campus. (Do not include health education courses for specific programs i.e. "Advanced Exercise Physiology")

1: Health education courses available and intended for general campus population. (i.e. "How to Lead a Healthy Lifestyle") Health education course credit is NOT required for all undergraduate students.

2: Health education credit requirement. The policy states that "X" credits must be completed to graduate. NA

### **12. Nutrition education Course Credit Requirement**

0: Do not include nutrition education courses for specific programs i.e. "Medical Nutrition Therapy"

1: i.e. "Introduction to Nutrition."

2: Nutrition education credit requirement. The policy states that "X" credits must be completed to graduate. NA

### **13. Physical Activity Education Course Credit Requirement**

0: Do not include physical education courses for specific programs i.e. "Teaching Elementary Physical Education."

1: i.e. "Spinning" or "Intro to Running.") Physical education course credit is NOT required for all undergraduate students.

2: Physical education credit requirement. The policy states that "X" credits must be completed to graduate. NA

### **14. Physical Activity During Work Hours**

0: No evidence that physical activity during work is promoted or permitted for employees.

1: No evidence that physical activity during work is promoted or permitted for employees.

2: There is a policy online that states employees should partake in physical activity during working hours to reduce sedentary time. NA

### **15. Active Environment (bike lanes, stairwells and sidewalks)**

0: No online walking/biking routes are referenced online. No pictures parks/sidewalks on campus. No "take the stairs" initiative/program.

1: Walking/biking routes are referenced online; Pictures of on campus or nearby parks; A "take the stairs" initiative/program is promoted.

2: Policy regarding active environment and facility maintenance for both safety AND use of bike lanes, etc. for health purposes. NA

### **16. Closed Campus**

0: Campus is open; No permit or pass is required to drive or park on campus.

1: Campus requires a pass/permit for driving/parking. There might be a policy that states restricted on campus driving is intended to limit traffic for safety purposes.

2: Campus policy states that campus completely closed. No parking/driving for general campus population. (excludes handicap, deliveries, etc.) NA

### **17. Sustainable Transportation**

0: No evidence of sustainable transportation programs.

1: Sustainable transportation resources online; campus car pooling program; Zip cars; Bus pass reimbursements.

2: Policy in regards to sustainable transportation. Alternative transportation resources/incentives included in the text.

### **18. Campus Health and Wellness Department**

0: No campus departments related to health and wellness

1: No campus central health/wellness department. Separate campus departments that collaborate. (i.e. Food services-Nutrition and Office of Health Promotion-mental health)

2: Policy that requires a single overarching department that is intended to promote to general health and wellness for campus population.

#### **18a. Check all professionals whom are employed through the health/wellness department and/or university.**

Medical Doctor, Registered Nurse , Nurse Practitioner , Registered Dietitian/Registered Dietitian Nutritionist , Employee with MPH , Certified sports specialist or expert (i.e. CPT), Specialty Medical Doctors (i.e. gynecologist), Psychologist

### **19. Healthy Campus Fundraising**

0: No fundraising policy or promotion of healthy fundraisers.

1: Campus might promote healthy fundraisers (i.e. ideas for healthy fundraising article). Campus fundraising policy might exist (i.e. no fundraising, employees can't fundraise, or gambling fundraisers.)

2: Policy that limits/restricts fundraisers. (i.e. no alcohol) Might be required to be obesity-prevention related (i.e. no candy sales)

**20. Healthy Employee Insurance Premium**

0: Campus does not offer health insurance.

1: Campus encourages employees to enroll in health insurance; not required; there might be an initiative to keep insurance rates low; insurance incentives (i.e. \$50 gift card for annual physical)

2: Requires all employees submit proof of insurance or enroll in campus insurance plan.

**21. The food service department on this campus is**

Contracted (i.e. Chartwells)

Independently run by the campus

**21a. Healthy Food Options - procured, served, marketed and strategically placed**

0: "Nutrition" not mentioned on the food service webpage

1: Nutrition information available online; Might not be campus specific (i.e. MyPlate); campus might have a healthy food pledge.

2: Policy requires healthy food options. Nutrition standards for healthy food (i.e. minimum % of healthy food options procured/served, etc.)

99: This campus does not serve food.

**22. Nutrient Minimum / Maximum Standards**

0: No nutrient information about food served on campus can be located.

1: Specific nutrient minimums or maximums standards; (i.e. trans fat free campus) All evidence is "standard practice" NOT a policy.

2: Campus has specific nutrient standards policy. Defines specific nutrient standards (i.e. Hot food will not exceed 500 mg sodium per serving)

99: This campus does not serve food.

**23. Healthy Food Labels and Point-of-Purchase Nutrition Information**

0: No evidence of a healthy food labeling program (i.e. Guiding Stars)

1: Healthy food option labeling or nutrition and ingredient labeling at point-of-purchase. Nutrition information is listed on menu boards if it is required by the state or county. (i.e. Starbucks on campus property)

2: Campus has a healthy food option labeling program and nutrient and ingredient labeling policy. Required nutrition information for food served on campus is required to be available.

99: This campus does not serve food.

**24. Food Taxes and Healthy Food Subsidies**

**Is the campus located in a state/county with a food tax or healthy food subsidy policy?**

**Please provide a URL link to the state/county policy.**

**24a. Campus Food Taxes and Healthy Food Subsidies**

0: No food tax or food subsidy on this campus.

1: Written statement/pledge to keep healthy food prices low to compete with unhealthy food options.

2: Food tax or food subsidy policy. The policy is NOT a federal, state or county policy. Policy defines the tax or subsidy (i.e all soda will be an addition 10 cents/bottle)

99: This campus does not serve or sell any food.

**25. Designated Eating Environments and Mindful Eating**

0: No designated places to eat on this campus (i.e. café or lunch room); No “lunch break” policy; No mindful eating programs.

1: Designated places to eat on campus; no “lunch break policy;” Mindful eating seminars/programs for population.

2: Designated places to eat on this campus; employees are required to take a lunch break; mindful eating programs might not be mentioned in the policy.

**26. Local and Sustainable Food - Free-range, organic, local, fair-trade, etc.**

0: No local or sustainable food is procured or marketed.

1: Local and sustainable food is mentioned; local vendors and farms are referenced; local food pledge/commitment

2: Policy requires that all food or specific foods come from within a specific mile radius; policy might state that during local seasons the campus will purchase from local farmers

99: This campus does not serve or sell any food.

**27. Organic Waste Reduction and Disposal - recycling, composting, etc.**

0: No sustainability initiatives.

1: Sustainability programs/initiatives in regard to food waste and food trash. (i.e. water used in dish room, drinking water, food compost, food donations, etc.)

2: Sustainability policy requires that all waste be composted; food service department must minimize water use; all water fountains will be installed in buildings to reduce water bottle purchases, etc.

**28. Does this campus have a nearby local farmers market? (<10 miles from campus)**

(Google search: {city name} farmers market)

Yes / No

**29. Local Food Access On-Campus - campus farmers market, Community Supported Agriculture, and campus gardens**

0: No local food access program

1: Student organization or club might run a CSA pickup on campus; campus garden; department plans/hosts a farmers market; bus from campus to local farmers market runs once/week, etc.

2: Campus has a local food access policy. It might define specific local food access initiatives and programs. Funding/department in charge should be stated in policy.

**30. Does this campus have a campus garden that grows food?**

Yes /No

**31. On-Campus Housing**

0: No on-campus housing for students.

1: On-campus housing available but not required. Students might be encouraged to live on campus for the first two years.

2: Policy states required number of years/class standing that students must live on campus..

99: This topic does NOT apply to this campus population.

**32. Can students choose to eat on- or off-campus?**

Yes / No

**33. Dining Hall Contract**

0: There is no evidence of dining hall contracts or meal plans available on this campus. All food is purchased independently.

1: There is a meal plan policy for campus members who wish to purchase one. The dining hall contract is optional. (ex. 1 meal/day)

2: This campus has a dining contract policy that requires students living on-campus to purchase a meal plan. Students living off-campus and employees can purchase an optional meal plan.

99: There are no dining halls or food courts on this campus.

**34. Food Security Initiative**

0: No food security resources referenced.

1: Resources for federal food assistance programs (SNAP or WIC); Campus food bank or weekly free meal; Campus office can assist in SNAP application.

2: Food security policy that requires a department to assist campus population in requiring means to purchase food, food, or enrolling in a food assistance program.
